# Supplementary material for: When a knockout is an Achilles’ heel: Resistance to one potyvirus species triggers hypersusceptibility to another one in Arabidopsis thaliana
Source: PubMed Central journal article supplement (PMC7865081; doi:10.1111/mpp.13031), 2020-12-29
Supplement: MPP-22-334-s006.pdf [file MPP-22-334-s006.pdf]

| Sample                        | Nucleotide polymorphism |            |          | Amino acid polymorphism |                 |          |
|-------------------------------|-------------------------|------------|----------|-------------------------|-----------------|----------|
|                               | Reference VPg           | SNP        | Position | Reference VPg           | AA substitution | Position |
| wild-type 1                   | A                       | R (A or G) | 338      | D (GAC)                 | G (GGC)         | 113      |
| wild-type 2                   |                         |            |          |                         |                 |          |
| wild-type 3                   |                         |            |          |                         |                 |          |
| wild-type 4                   |                         |            |          |                         |                 |          |
| wild-type 5                   | A                       | R (A or G) | 358      | N (AAU)                 | D (GAU)         | 120      |
| wild-type 6                   | C                       | Y (C or U) | 341      | S (UCA)                 | L (UUA)         | 114      |
| <i>eif4e1<sup>KO</sup></i> 1  |                         |            |          |                         |                 |          |
| <i>eif4e1<sup>KO</sup></i> 2  |                         |            |          |                         |                 |          |
| <i>eif4e1<sup>KO</sup></i> 3  |                         |            |          |                         |                 |          |
| <i>eif4e1<sup>KO</sup></i> 4  |                         |            |          |                         |                 |          |
| <i>eif4e1<sup>KO</sup></i> 5  |                         |            |          |                         |                 |          |
| <i>eif4e1<sup>KO</sup></i> 6  | A                       | R (A or G) | 358      | N (AAU)                 | D (GAU)         | 120      |
| <i>eif4e1<sup>KO</sup></i> 7  | A                       | R (A or G) | 310      | M (AUG)                 | V (GUG)         | 104      |
| <i>eif4e1<sup>KO</sup></i> 8  |                         |            |          |                         |                 |          |
| <i>eif4e1<sup>KO</sup></i> 9  | C                       | Y (C or U) | 341      | S (UCA)                 | L (UUA)         | 114      |
| <i>eif4e1<sup>KO</sup></i> 10 | A                       | M (A or C) | 344      | N (AAU)                 | T (ACU)         | 115      |

**Supplementary table 1.** Recapitulative table of detected single nucleotide polymorphisms (SNP) at the TuMV VPg coding sequence and the associated amino acid substitutions at relative to the reference TuMV-GFP UK1 VPg sequence (GenBank ID: EF028235.1) obtained from six wild-type and ten *eif4e1<sup>KO</sup>* TuMV-GFP UK1-inoculated plants. The identical polymorphisms corresponding to the amino acid substitutions N120G and S114L observed in TuMV VPg sequences obtained from both wild-type and *eif4e1<sup>KO</sup>* plants are highlighted in green and blue, respectively.
